# Supplementary material
Source: PubMed Central journal article supplement (PMC4028204)
Supplement: NIHMS57796-supplement-1.pdf [file NIHMS57796-supplement-1.pdf]

# Supplementary Information

Plant Perception of  $\beta$ -aminobutyric acid is mediated by an  
aspartyl tRNA synthetase

Estrella Luna, Marieke van Hulten, Yuhua Zhang, Oliver Berkowitz, Ana López,  
Pierre Pétriacq, Matthew A. Sellwood, Beining Chen, Mike Burrell, Allison van de  
Meene, Corné M.J. Pieterse, Victor Flors, and Jurriaan Ton

## Supplementary Results

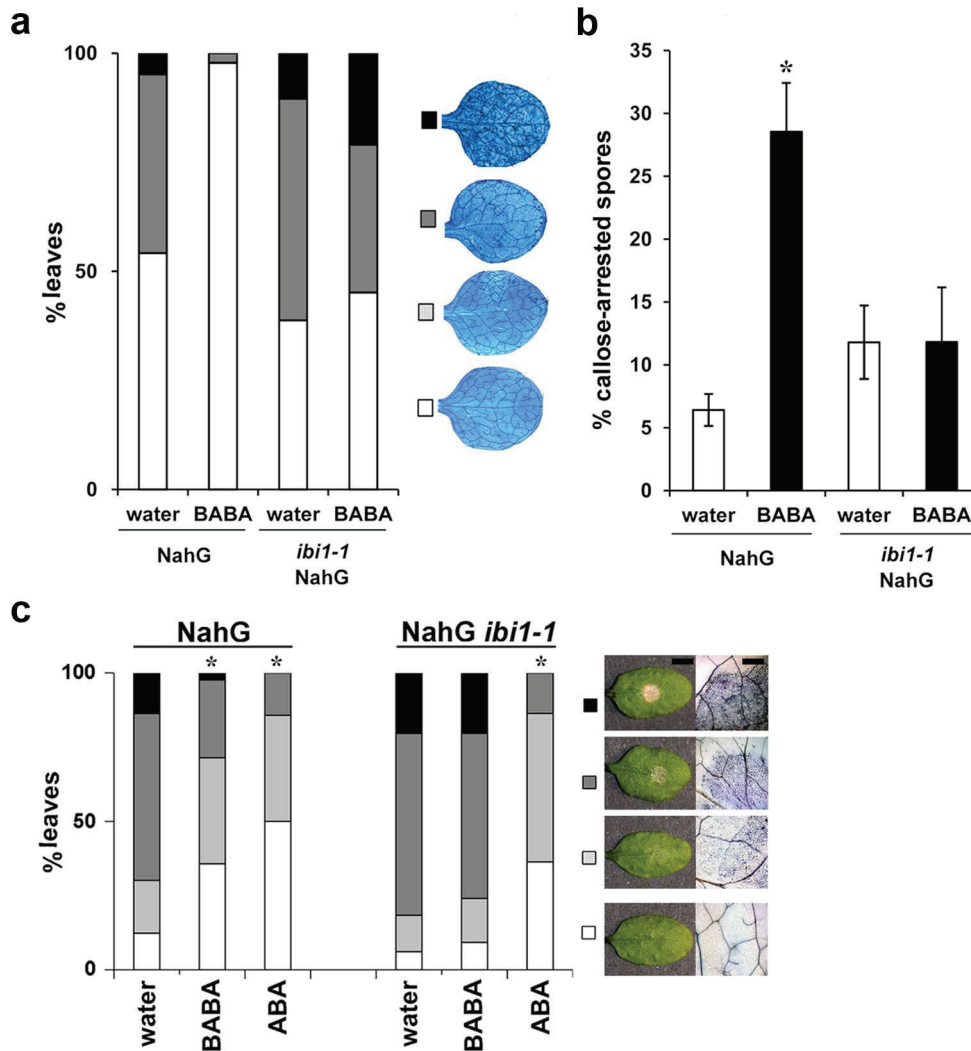

**Supplementary Figure 1: IBI1 controls SA-independent BABA-induced resistance against biotrophic and necrotrophic pathogens.** (a) The *ibi1-1* mutation in the genetic background of SA-deprived NahG blocks induced resistance against biotrophic *H. arabidopsidis* WACO9 after root treatment with BABA (150  $\mu$ M). Insets show different classes of pathogen colonization. (b) Relative levels of arrested *H. arabidopsidis* WACO9 spores in NahG and NahG *ibi1-1* after treatment with water or BABA (150  $\mu$ M). Data represent mean percentages ( $\pm$  SEM) of conidiospores, from which the emerging germ tubes were encapsulated in callose. Asterisk indicates a statistically significant difference in comparison to water-treated plants according to a Student's t-test ( $p < 0.05$ ,  $n = 15$ ) and a Binomial test ( $p < 0.05$ ). (c) Levels of induced resistance against necrotrophic *Plectosphaerella cucumerina* in NahG and NahG *ibi1-1* after root treatment with BABA (150  $\mu$ M) or ABA (75  $\mu$ M). Insets show different classes of lesion severity and pathogen colonization/cell death. Asterisks indicate statistically significant differences in class distribution relative to water-treated control plants ( $\chi^2$  test or Fisher's exact test,  $p < 0.01$ ,  $n = 50-100$ ). Scale bars = 4 mm (left panel) and 0.75 mm (right panel)

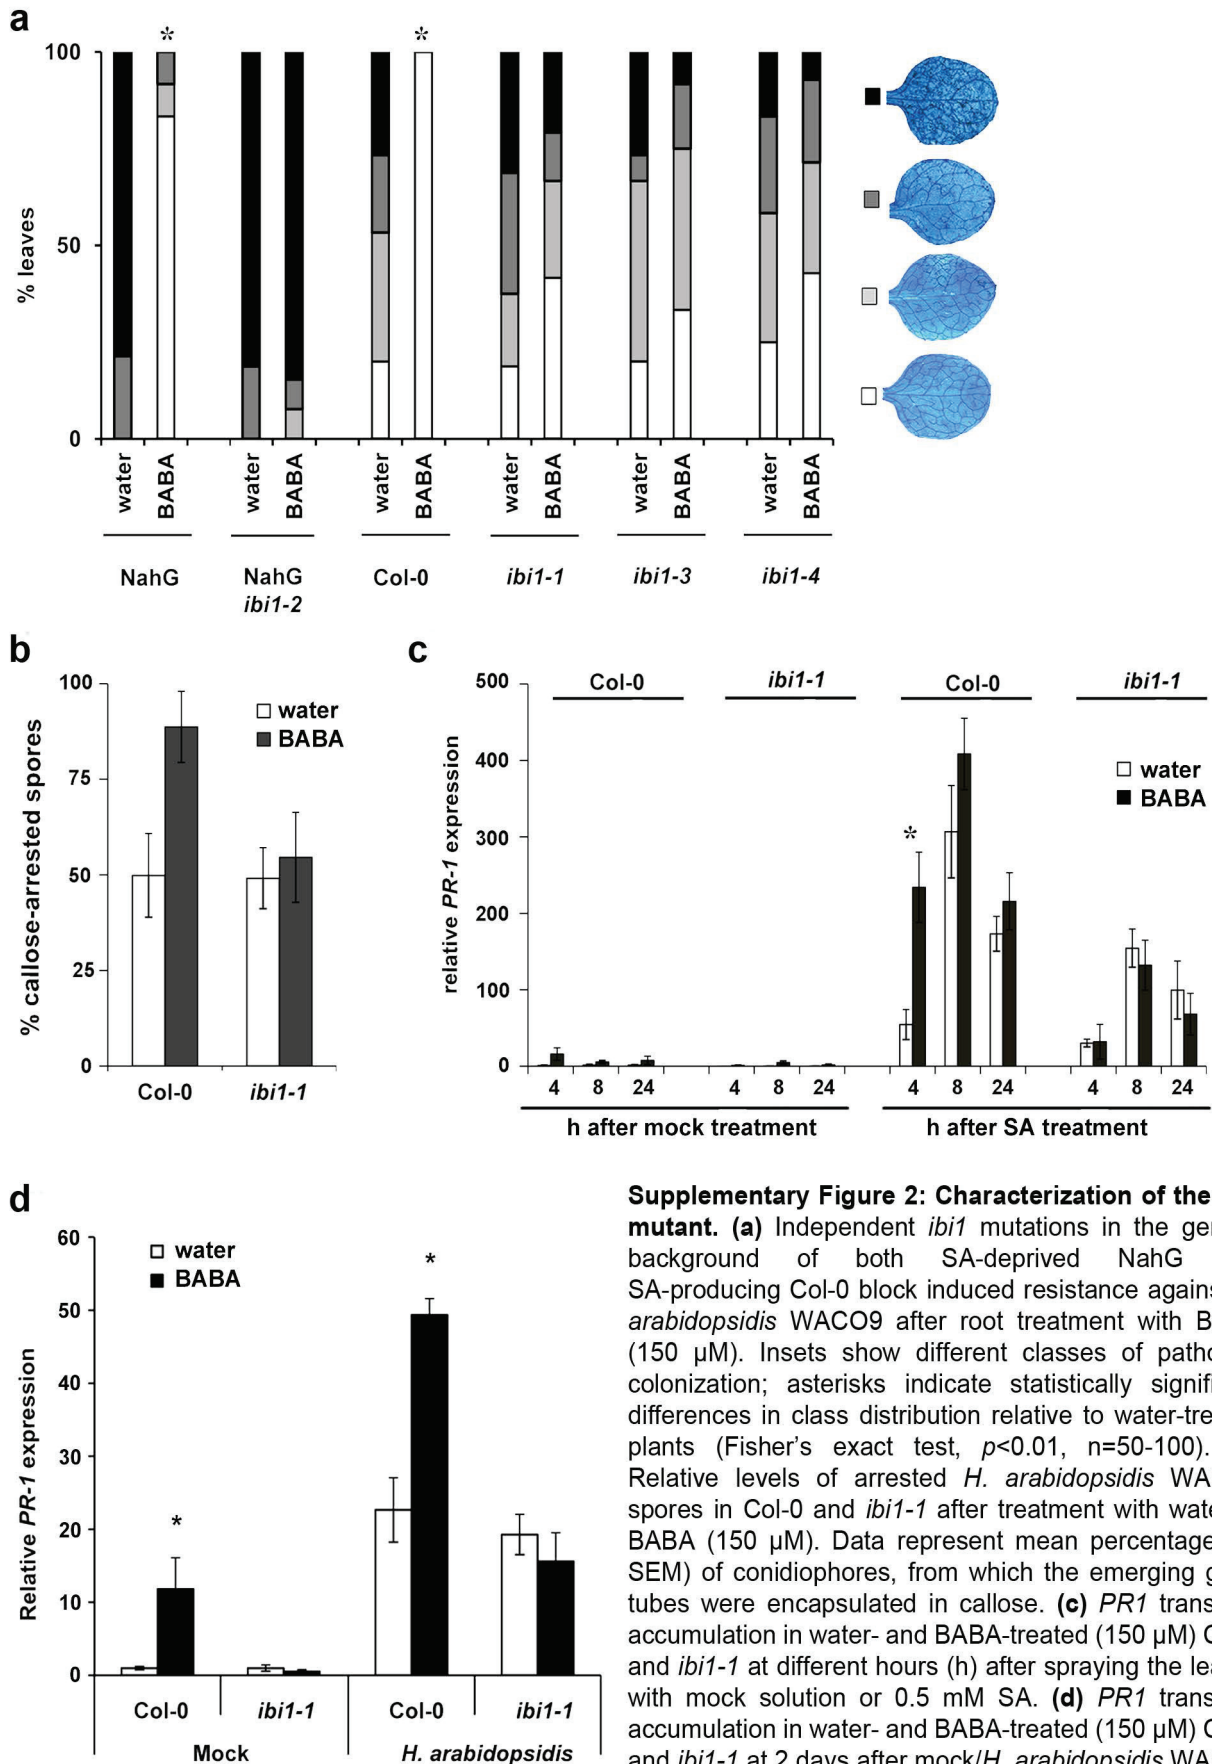

**a**

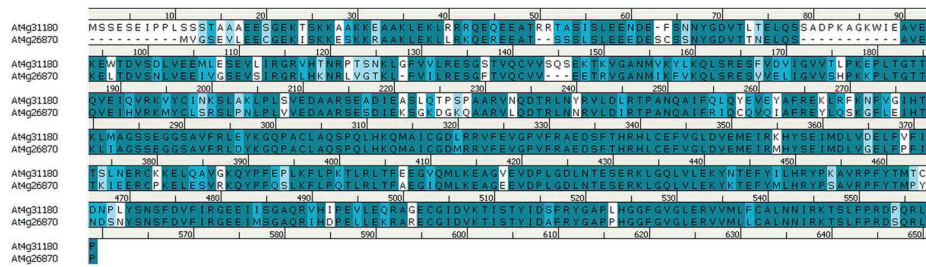

**b**

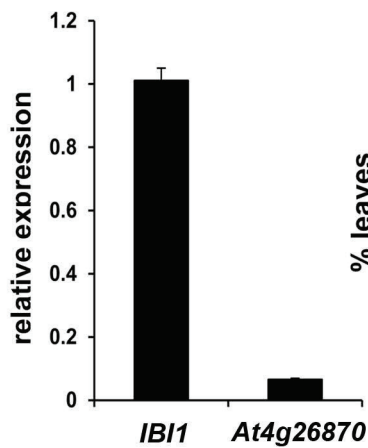

**c**

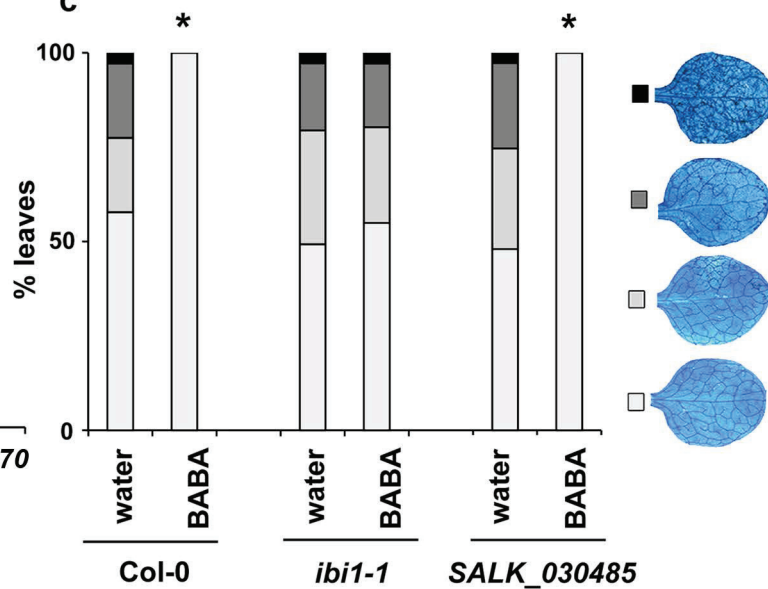

**Supplementary Figure 3. The IBI1 homologue At4g26870 does not regulate BABA-induced resistance. (a)** Protein alignments between IBI1 and At4g26870. Dark blue shades indicate identical amino acid sequences; light blue shades indicate similar amino acid sequences. **(b)** Basal transcription of *IBI1* and *At4g26870* in wild-type plants (Col-0). Data represent average values of relative gene expression ( $\pm$  SEM;  $n=3$ ). **(c)** Levels of induced resistance against *H. arabidopsidis* WACO9 after root treatment with BABA (150  $\mu$ M) in Col-0, *ibi1-1* and a T-DNA insertion mutant of *At4g26870* (*SALK\_030485*). Insets show different classes of pathogen colonization; asterisks indicate statistically significant differences in class distribution relative to water-treated plants (Fisher's exact test,  $p<0.01$ ,  $n=50-100$ ).

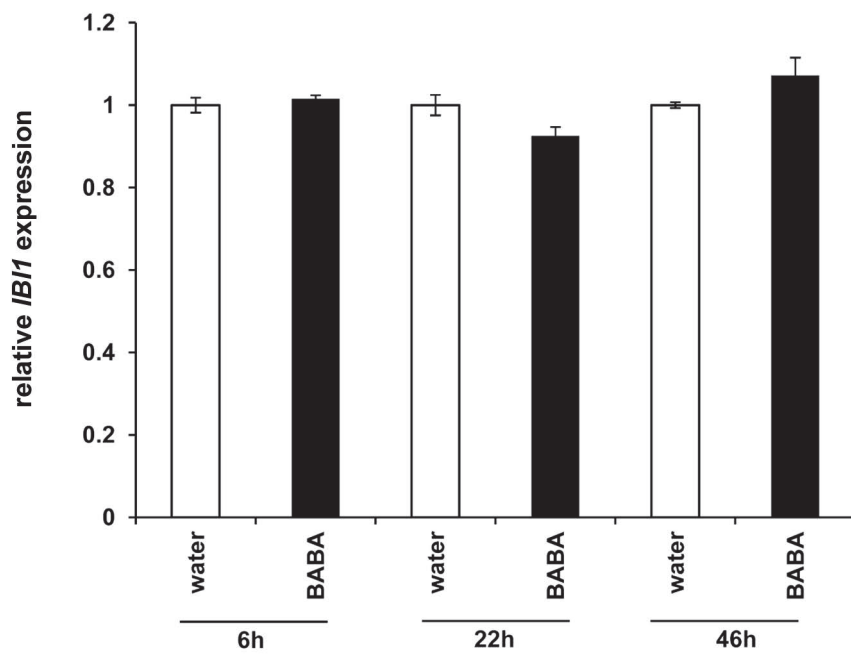

**Supplementary Figure 4. The *IB1* gene is transcriptionally unresponsive to BABA.** Data represent average gene expression values ( $\pm$  SEM,  $n=3$ ) relative to water-treated Col-0 at different hours (h) after treatment with BABA (150  $\mu$ M).

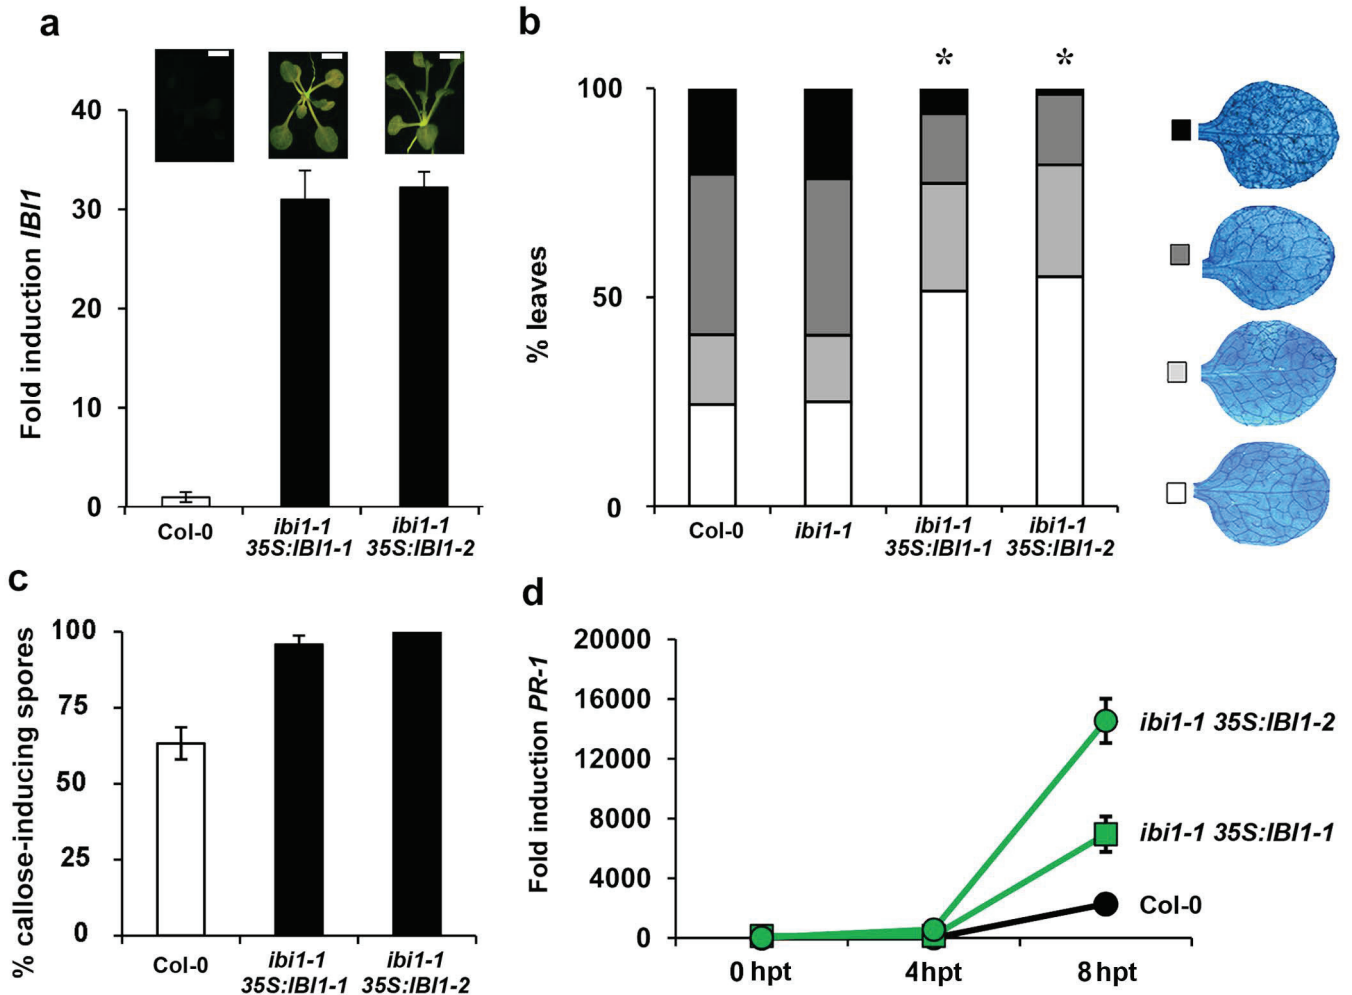

**Supplementary Figure 5. Characterization of transgenic *ibi1-1* 35S:*IBI1*:YFP lines.** (a) Levels of *IBI1* transcription in Col-0 in comparison to two independent 35S:*IBI1*:YFP lines in the genetic background of the *ibi1-1* mutant. Shown are average transcript levels of *IBI1* ( $\pm$  SEM,  $n=3$ ) relative to un-treated Col-0 plants. Insets show YFP fluorescence of transgenic seedlings. Scale bar= 3 mm. (b) Levels of basal resistance against *H. arabidopsidis* WACO9 in Col-0, *ibi1-1* and two independent *ibi1-1* 35S:*IBI1*:YFP lines at 5 dpi. Insets show different classes of pathogen colonization; asterisks indicate statistically significant differences in class distribution relative to water-treated wild-type plants (Fisher's exact test,  $p<0.01$ ,  $n=50-100$ ). (c) Relative levels of arrested *H. arabidopsidis* WACO9 spores in Col-0 and *ibi1-1* 35S:*IBI1*:YFP lines after treatment with water or BABA (150  $\mu$ M). Data represent mean percentages ( $\pm$  SEM,  $n=10$ ) of conidiospores, from which the emerging germ tubes were encapsulated in callose. (d) *PR1* transcript accumulation in Col-0 and *ibi1-1* 35S:*IBI1*:YFP lines at 4 and 8 hours post SA treatment (hpt; 0.5 mM). Values indicate average levels of *PR1* induction relative to average transcript levels in Col-0 plants before SA application.

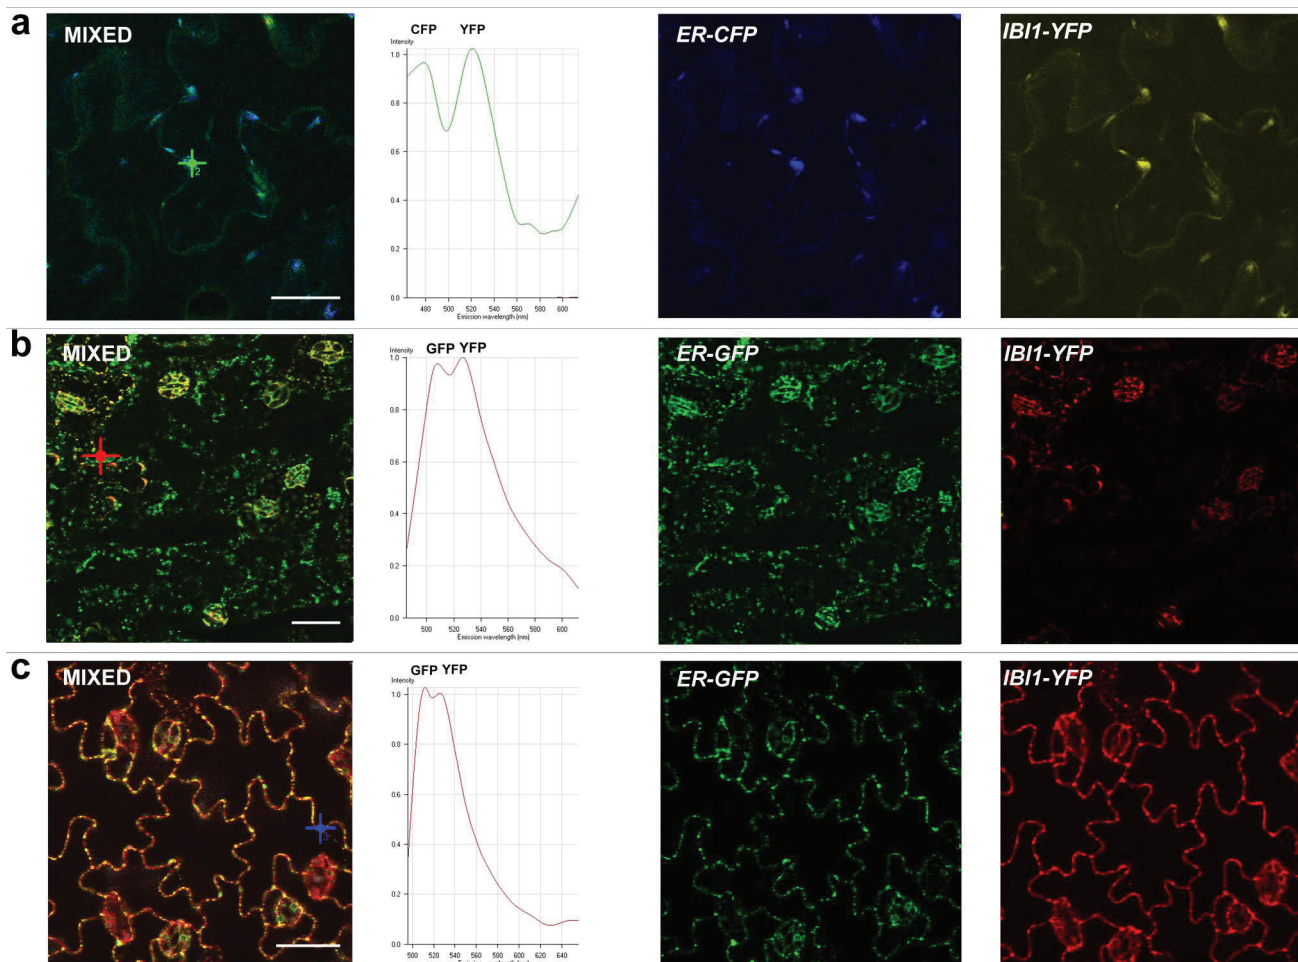

**Supplementary Figure 6. Co-localization of IBI1-YFP with ER-CFP (a) or ER-GFP (b and c) in un-primed plants. (a)** YFP and CFP fluorescence in cotyledon cells of 2-week-old F1 progeny (*35S:IBI1:YFP-1 x ER-ck*), scanned with a multi-photon laser. Scale bar = 10  $\mu$ m. **(b)** YFP and GFP fluorescence in cells of an epidermal peel from leaves of 5-week-old F1 progeny (*ibi1-1 35S:IBI1:YFP-1 x ER-gk*), scanned with a multi-photon laser. Scale bar = 50  $\mu$ m. **(c)** YFP and GFP fluorescence in cotyledon cells of 2-week-old F1 progeny (*ibi1-1 35S:IBI1:YFP-1 x ER-gk*), scanned with a single-photon laser. Scale bar = 50  $\mu$ m. Mixed photographs (left) show merged fluorescence spectra (centre) at the emission range of both fluorescent proteins from the targeted region (indicated by a cross). Un-mixed photographs (right) show fluorescence from each of the two fluorescent proteins. YFP fluorescence in analyses of F1 progeny from *ibi1-1 35S:IBI1:YFP-1 x ER-gk* in **(a)** and **(b)** has been adjusted to red to facilitate distinction with GFP fluorescence.

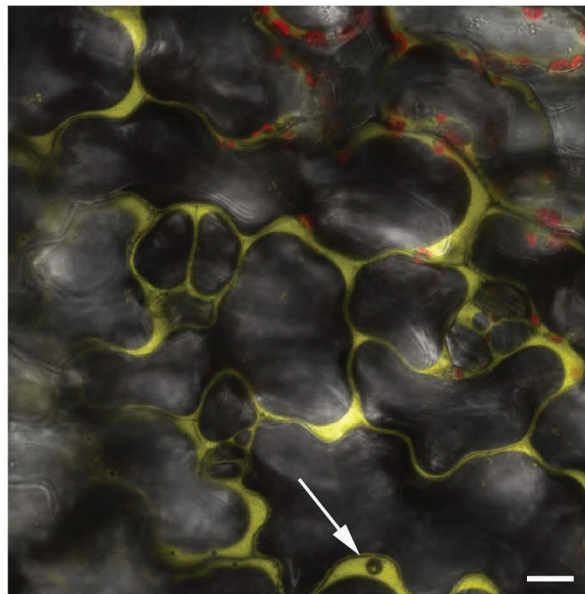

**Supplementary Figure 7.** Localisation of IB11-YFP in peripheral cytoplasm of epidermal leaf cells from BABA-treated *ibi1-1 35S:IB11:YFP-1* plants (150  $\mu$ M) at 5 dpi with *H. arabidopsis*. The arrowhead points to a nucleus that is fully surrounded by yellow fluorescence from IB11-YFP. Scale bar = 15  $\mu$ m



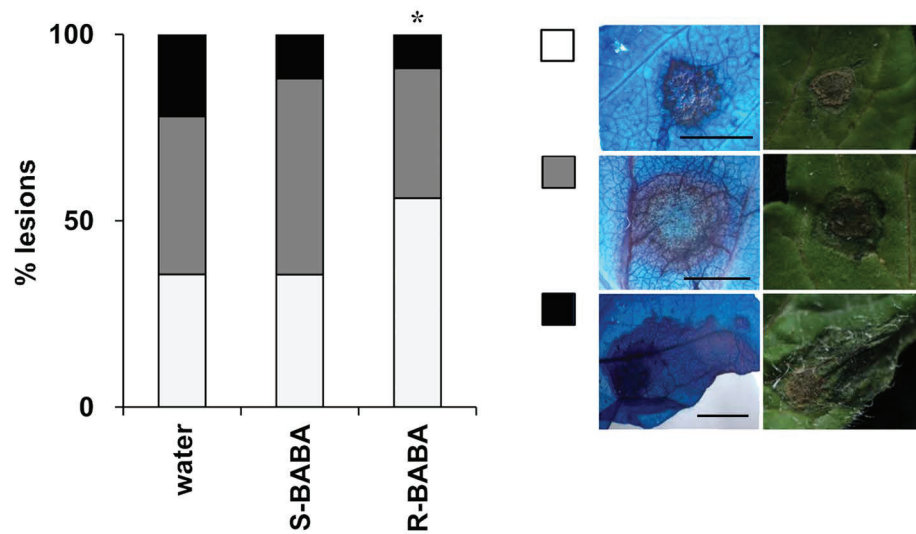

**Supplementary Figure 8. Enantiomer-specificity of BABA-induced resistance in tomato against *Botrytis cinerea*.** Levels of induced resistance in tomato (cv. Micro-Tom) after root treatment with water, S-BABA (500  $\mu$ M), or R-BABA (500  $\mu$ M). Insets show different classes of lesion severity, pathogen colonization and cell death; asterisk indicates a statistically significant difference in class distribution compared to water-treated plants ( $\chi^2$  test,  $p < 0.05$ ,  $n = 15$ ). Scale bars = 5 mm.

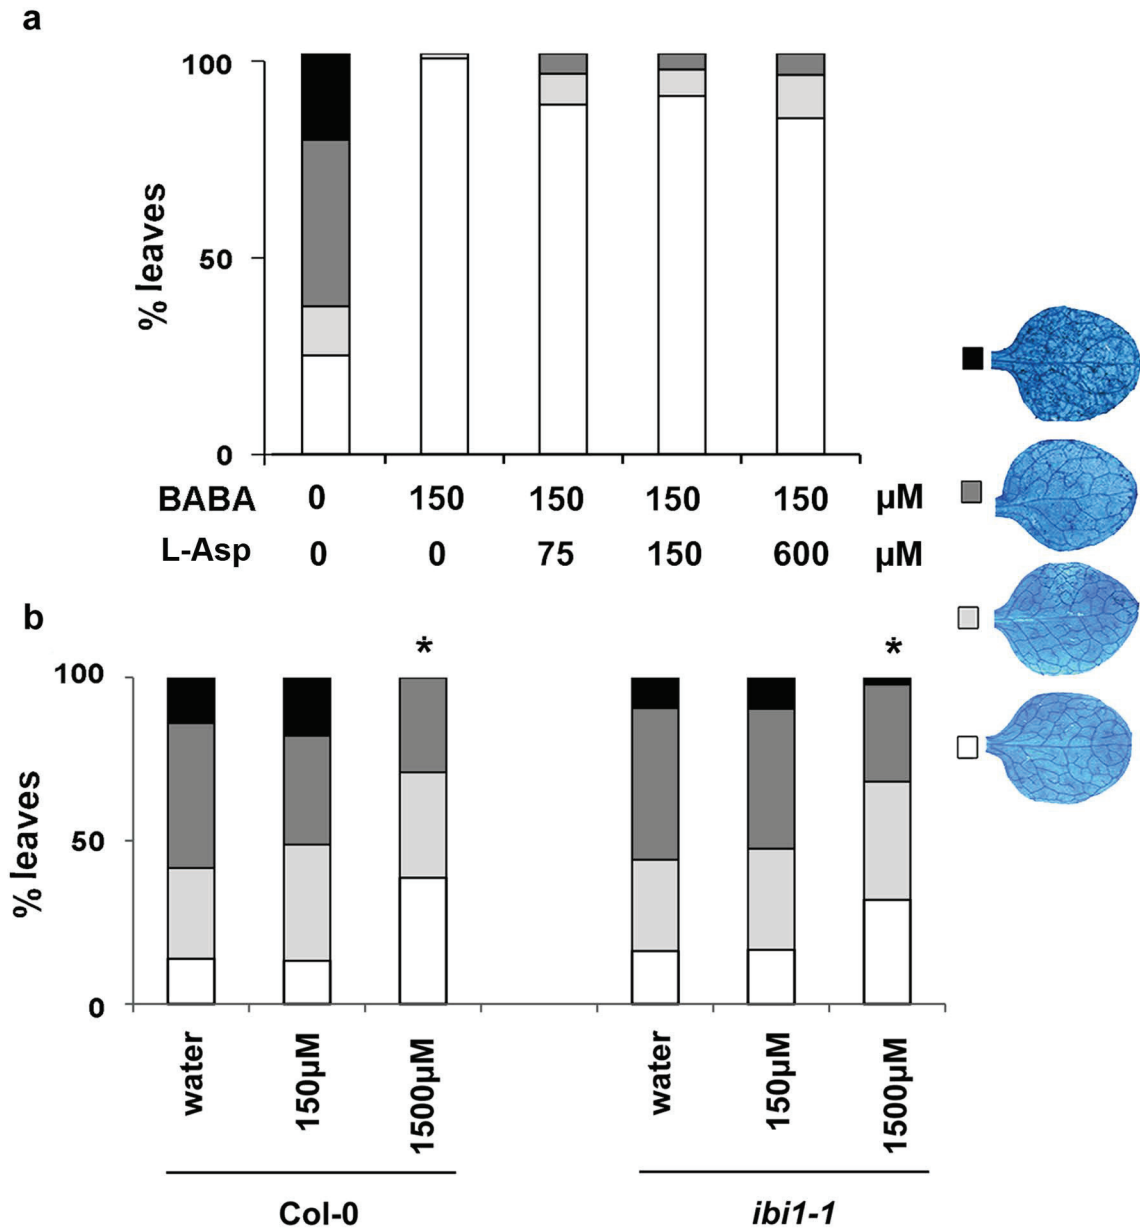

**Supplementary Figure 9. (a)** Levels of induced resistance against *H. arabidopsidis* WACO9 in Col-0 after co-application of BABA with increasing concentrations of L-Asp to the roots. **(b)** Levels of induced resistance against *H. arabidopsidis* WACO9 (Col-0 and *ibi1-1*) after root treatment with 150 or 1500  $\mu\text{M}$  L-Asp. Insets show different classes of pathogen colonization; asterisks indicate statistically significant differences in class distribution compared to water-treated plants (Fisher's exact test,  $p < 0.01$ ,  $n = 50-100$ ).

**a**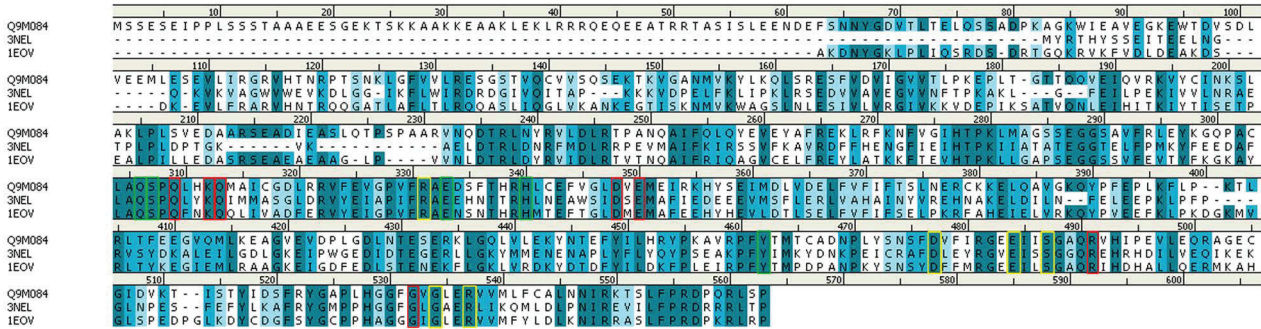**b**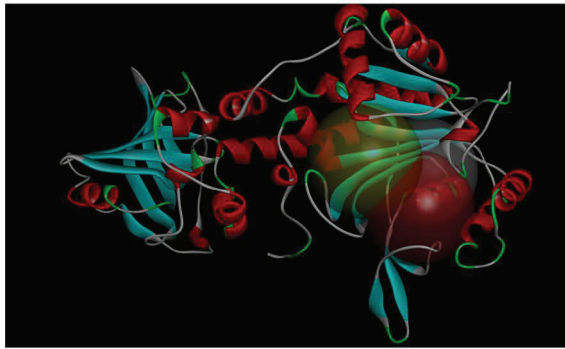**c**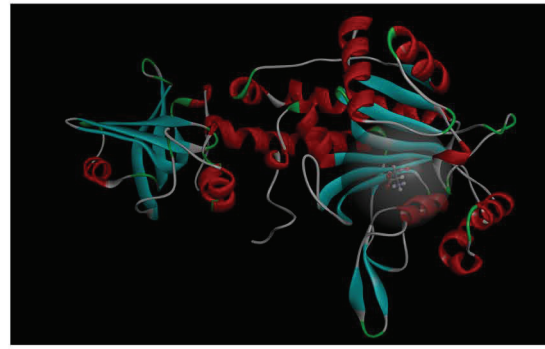

**Supplementary Figure 10. Protein models of aspartyl-tRNA synthetase (AspRS) from Arabidopsis, *Pichia pastoris*, and *Pycorococcus kodakaraensis*. (a) Sequence alignment of Arabidopsis IB11 (Q9M084; top) with *P. pastoris* AspRS (1EOV; bottom), and *P. kodakaraensis* AspRS (3NEL; middle). Coloured squares highlight conserved residues of binding domains to tRNA (green), ATP (yellow), and L-Asp (red). (b) Crystal structure of *P. pastoris* AspRS, highlighting the tRNA-binding site (red sphere), ATP-binding site (yellow sphere) and the L-Asp-binding site (grey sphere). (c) Crystal structure of *P. kodakaraensis* AspRS, highlighting the L-Asp binding domain in grey with co-crystallised L-Asp molecule.**

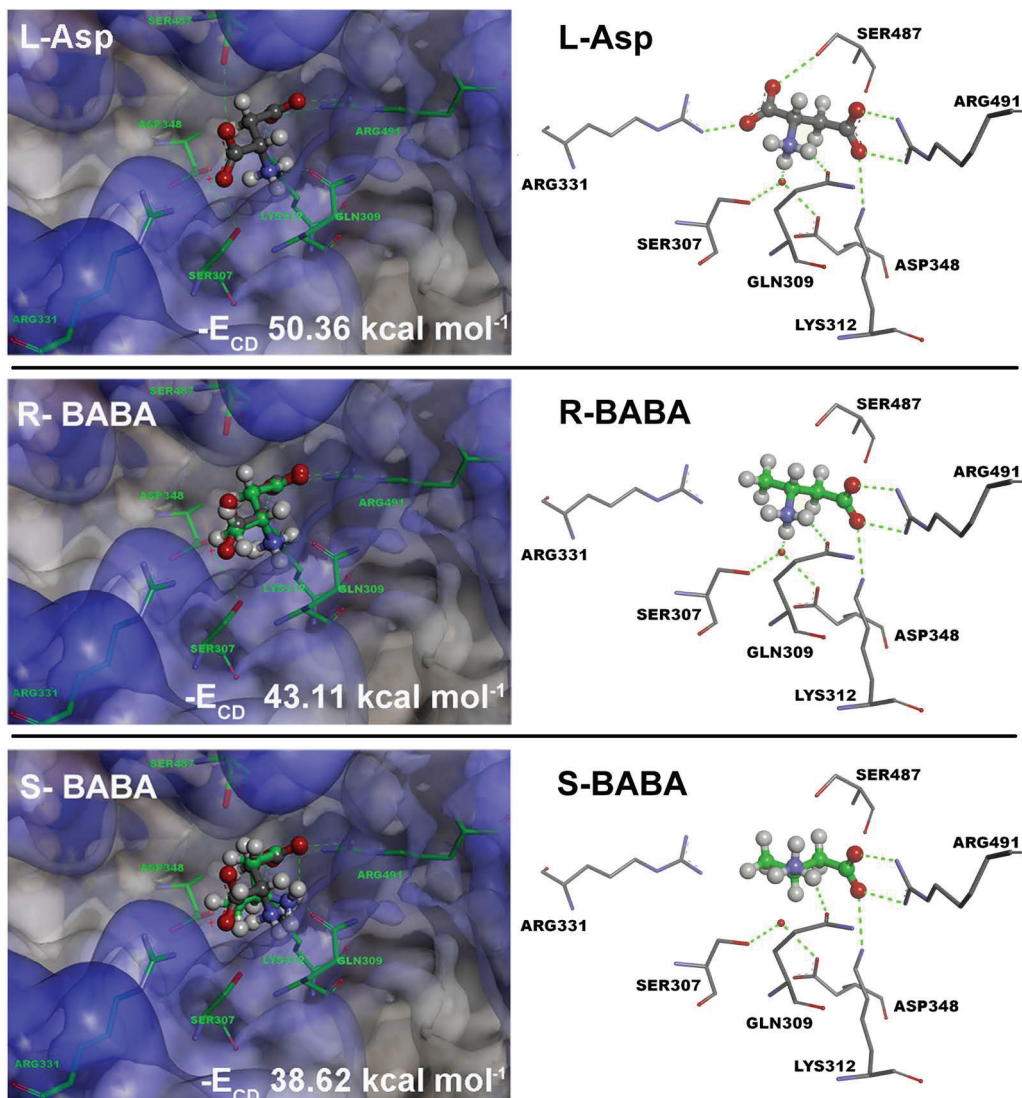

**Supplementary Figure 11. Interaction models for binding of L-Asp, R-BABA or S-BABA to the L-Asp binding pocket of *P. kodakaraensis* AspRS.** Left panels: 3-D crystal structures of the L-Asp binding pocket of the protein with co-crystallised L-Asp (top; grey), overlaid with a high score docking pose of R-BABA (middle; green) or S-BABA (bottom; green). Numbers indicate CHARMM energy values of the ligand-protein complex. Right panels: 3-D interaction maps showing the key hydrogen bonding interactions between L-Asp (top; grey), R-BABA (middle; green), or S-BABA (bottom; green) with key residues in the binding pocket of AspRS.

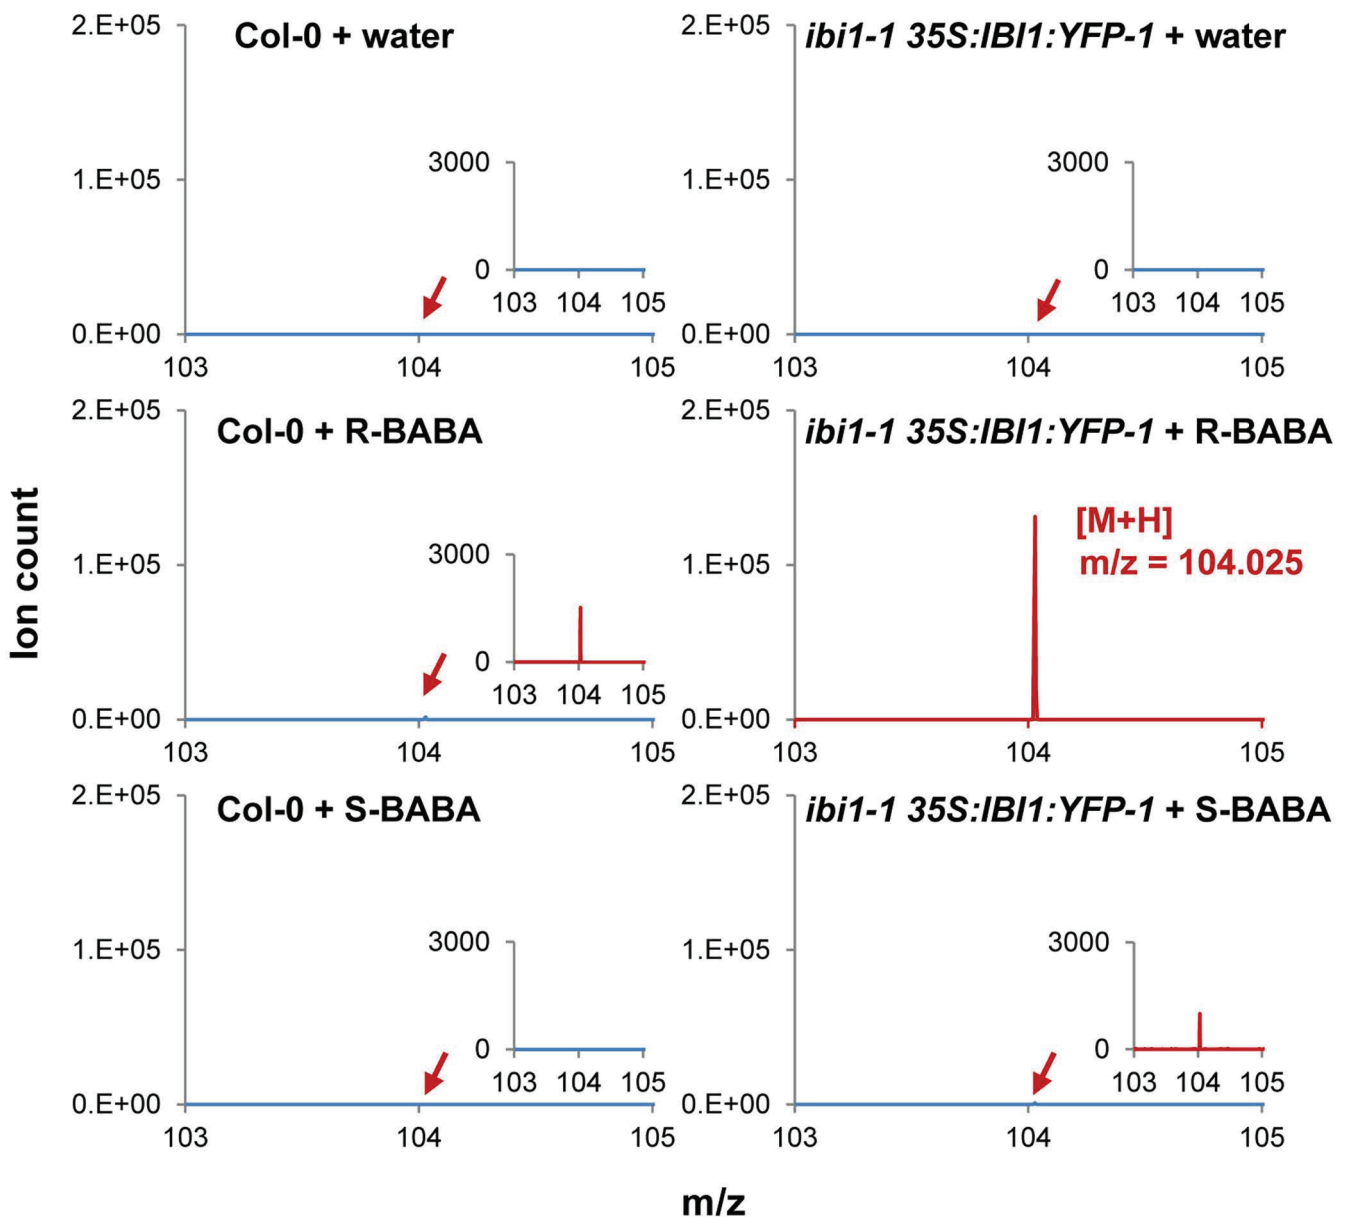

**Supplementary Figure 12.** Mass spectrometry detection of BABA from immunoprecipitated IBI1:YFP of *ibi1-1 35S:IBI1:YFP-1* or un-transformed Col-0 (negative control), using electrospray ionization coupled to quadrupole-time-of-flight analysis (ESI-qTOF; [M+H]<sup>+</sup>; red arrows indicate intensities at m/z=104,025). Immunoprecipitation (IP) was performed with protein extracts from leaves after two successive root treatments with water (control), R-BABA (1.2 mM), or S-BABA (1.2 mM). ESI-qTOF analysis of IP extracts from *ibi1-1 35S:IBI1:YFP-1* plants after R- or S-BABA applications was repeated twice from material of independent experiments, yielding similar results. Insets show spectra at higher sensitivity.

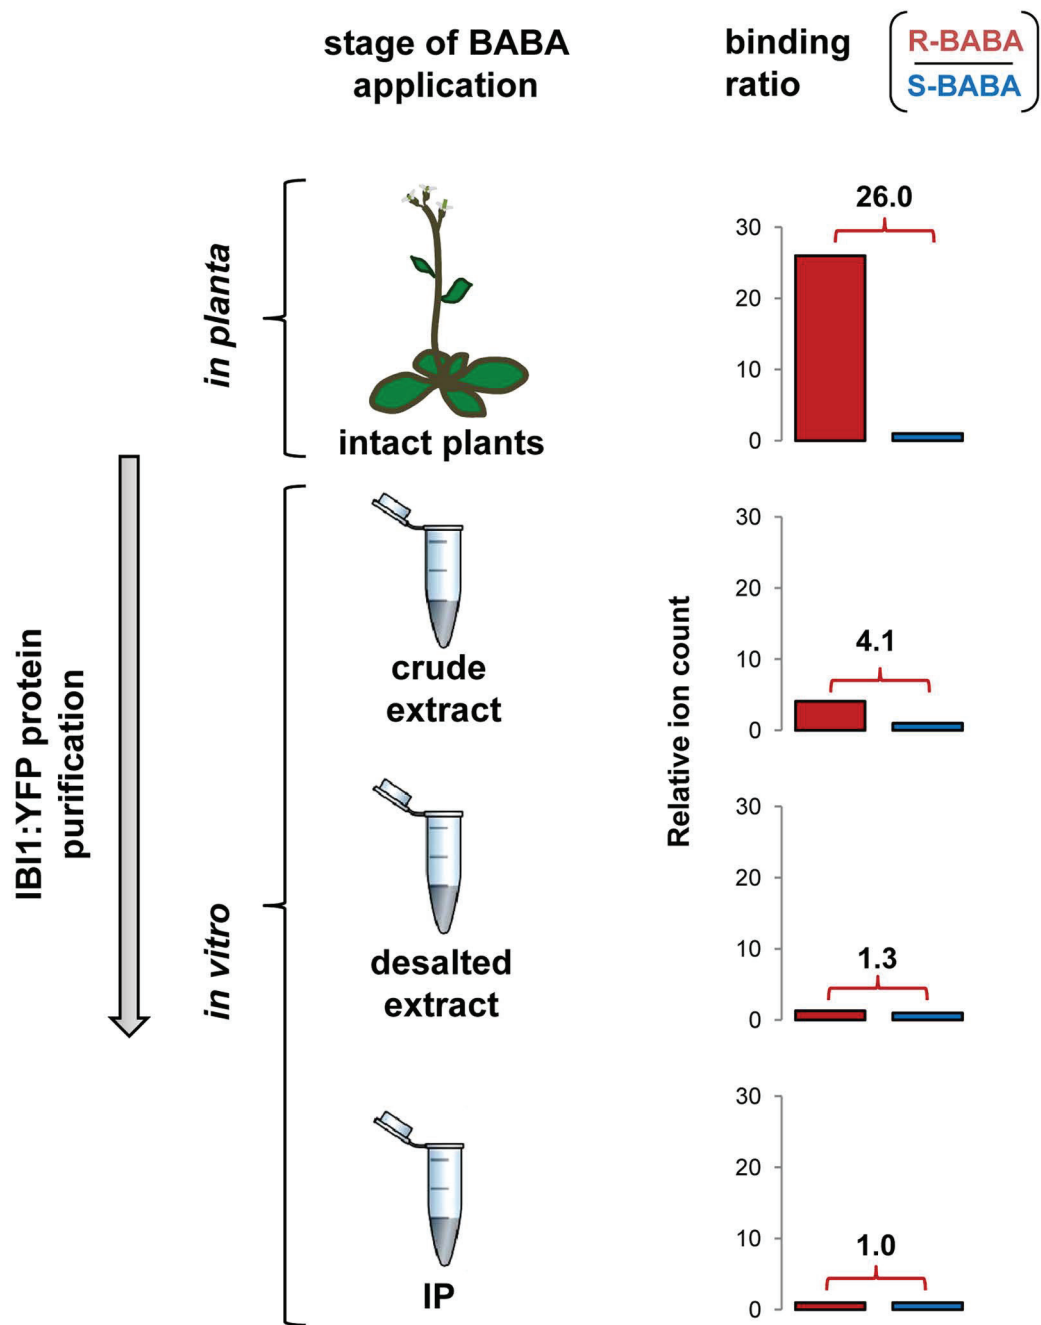

**Supplementary Figure 13. Purification of IB11:YFP from over-expression plants affects enantiomer-specific binding capacity to BABA.** When R- and S-BABA are applied to intact *IB11:YFP-1* plants, the level of BABA retained after immunoprecipitated IB11:YFP is 26-fold higher from R-BABA-treated plants than from S-BABA-treated plants (see fig. 3b). When the BABA enantiomers are applied to crude protein extract, this binding ratio is reduced to 4.1-fold. When the binding assay is performed with sephadex-purified protein extract and immunoprecipitated IB11:YFP, the specific binding ratio is reduced further to 1.4 and 1.0, respectively.

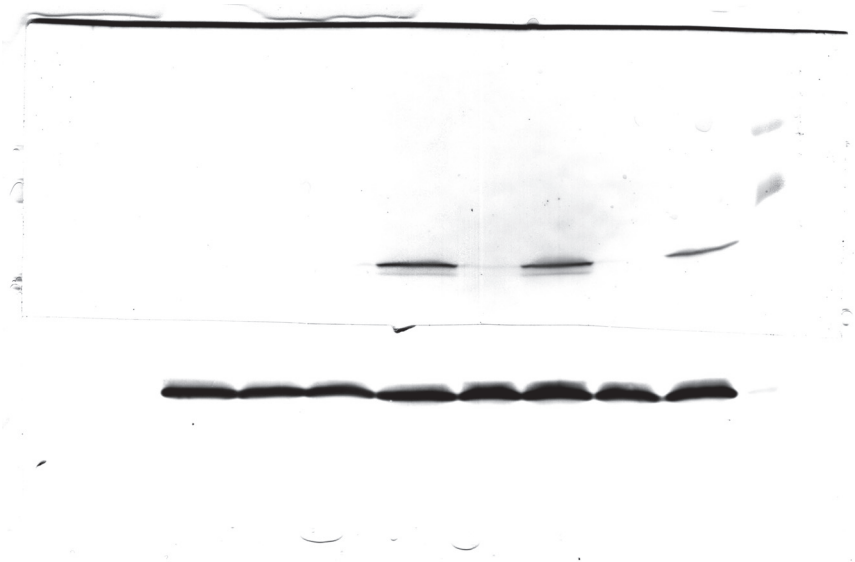

**Supplementary Figure 14.** Original scans of protein blots of figure 4a.

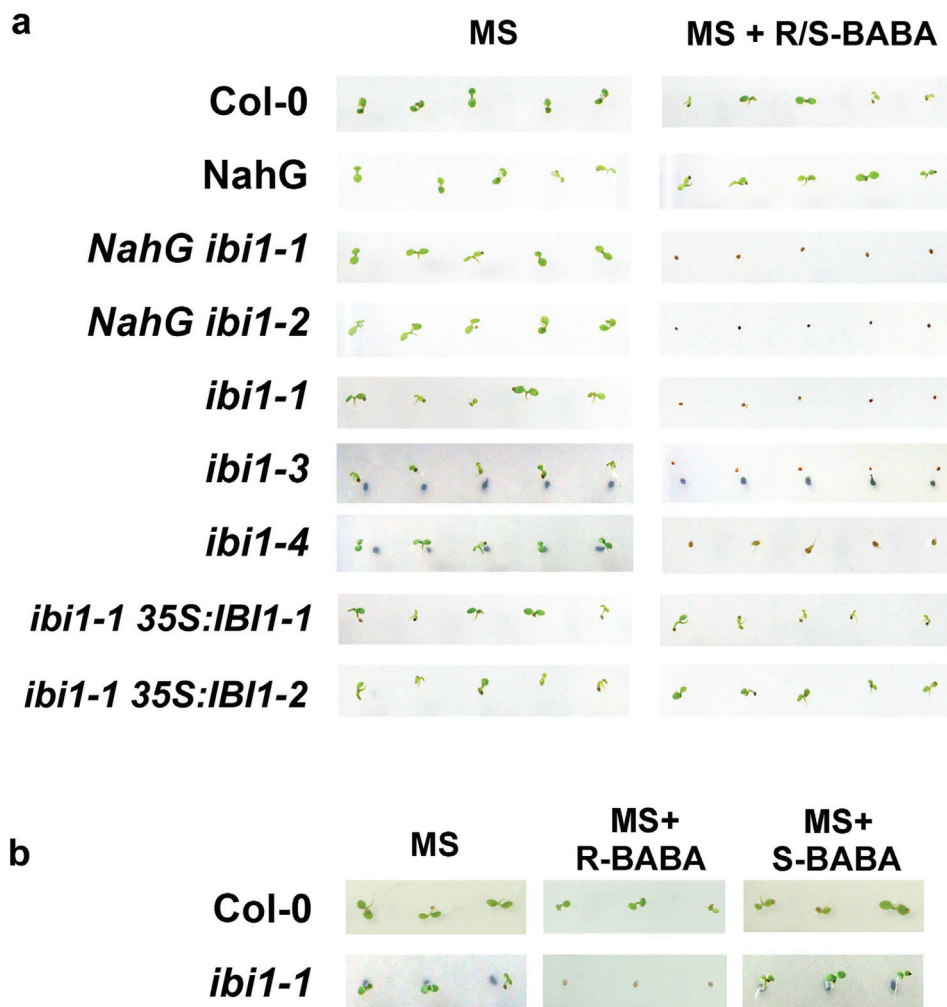

**Supplementary Figure 15. Role of IBI1 in BABA-induced stress. (a)** Different mutations in *IBI1* block seedling growth on BABA-containing agar (500  $\mu$ M), which occurs independently from salicylic acid. **(b)** Growth suppression of *ibi1-1* on BABA-containing agar (500  $\mu$ M) is enantiomer-specific. Photographs show germination rates and seedling growth on  $\frac{1}{2}$  strength MS agar medium at 10 days after planting.



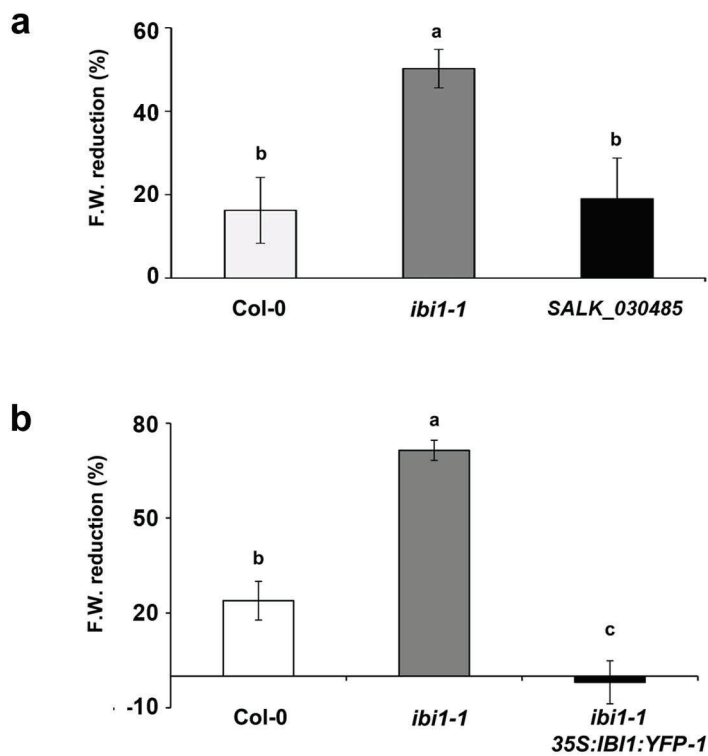

**Supplementary Figure 16.** Levels of BABA-induced growth suppression at 1 week after root treatment with BABA (400  $\mu$ M) in **(a)** Col-0, *ibi1-1* and a T-DNA insertion mutant of At4g26870 (*SALK\_030485*) and **(b)** Col-0, *ibi1-1* and *ibi1-1 35S:IBI1:YFP-1*. Shown are mean percentages ( $\pm$  SEM, n=15) of fresh weight (F.W.) reduction in BABA-treated plants relative to water-treated plants. Different letters indicate statistically significant differences between genotypes (Fisher's least significant differences test;  $p < 0.05$ ).

**Supplementary Table 1:** Experimental details of *in vitro* AspRS activity assays.

| Substrate  |          |                             |                               | Reaction buffer |                      |         |               |                        |           |          |          | Conditions |                | Reference |
|------------|----------|-----------------------------|-------------------------------|-----------------|----------------------|---------|---------------|------------------------|-----------|----------|----------|------------|----------------|-----------|
| L-asp (mM) | ATP (mM) | tRNA <sup>Asp</sup> (ng/ul) | Crude tRNA wheat germ (µg/ml) | HEPES (mM)      | Tris-HCl pH 7.8 (mM) | BSA (%) | Spermine (mM) | MgCl <sub>2</sub> (mM) | NaCl (mM) | KCl (mM) | DTT (mM) | T (°C)     | Lenght (mins.) |           |
| 2          | 2        | -                           | -                             | -               | 100                  | 0.05    | -             | 10                     | -         | -        | -        | 37         | 30             | 36        |
| 2          | 1        | 100                         | -                             | -               | 25                   | 0.05    | 1             | 0.2                    | -         | -        | 0.1      | 37         | 30             | 37        |
| 2          | 0.2      | 80                          | -                             | 30              | -                    | -       | -             | 10                     | 140       | 30       | 5        | 23         | 60             | 38        |
| 2          | 0.2      | 80                          | -                             | 30              | -                    | -       | -             | 10                     | 140       | 30       | 1        | 23         | 15             |           |
| 2          | 0.2      | 80                          | -                             | 30              | -                    | -       | -             | 10                     | 140       | 30       | 1        | 37         | 15             |           |
| 2          | 0.2      | -                           | 0                             | 30              | -                    | -       | -             | 10                     | 140       | 30       | 1        | 37         | 15             |           |
| 2          | 0.2      | -                           | 8                             | 30              | -                    | -       | -             | 10                     | 140       | 30       | 1        | 37         | 15             |           |
| 2          | 0.2      | -                           | 80                            | 30              | -                    | -       | -             | 10                     | 140       | 30       | 1        | 37         | 15             |           |
| 2          | 0.2      | -                           | 800                           | 30              | -                    | -       | -             | 10                     | 140       | 30       | 1        | 37         | 15             |           |
| 2          | 0.2      | -                           | 0                             | 30              | -                    | -       | -             | 10                     | 140       | 30       | 1        | 23         | 60             |           |
| 2          | 0.2      | -                           | 8                             | 30              | -                    | -       | -             | 10                     | 140       | 30       | 1        | 23         | 60             |           |
| 2          | 0.2      | -                           | 80                            | 30              | -                    | -       | -             | 10                     | 140       | 30       | 1        | 23         | 60             |           |
| 2          | 0.2      | -                           | 800                           | 30              | -                    | -       | -             | 10                     | 140       | 30       | 1        | 23         | 60             |           |
| 2          | 0.2      | 80                          | -                             | 30              | -                    | -       | -             | 10                     | 140       | 30       | 1        | 37         | 30             |           |

**Supplementary Table 2.** Arabidopsis genotypes, backgrounds, origins, and/or PCR primers used for selection.

| Genotype           | Background | Origin        | PCR primers                                                                                                         |
|--------------------|------------|---------------|---------------------------------------------------------------------------------------------------------------------|
| NahG B15           | Col-0      | 34            | Fw: ACTCTGCCGCTACTCCATA<br>Rv: CGAGCCCTAGGTACATCTGC                                                                 |
| NahG <i>ibi1-1</i> | NahG B15   | Mutant Screen |                                                                                                                     |
| NahG <i>ibi1-2</i> | NahG B15   | Mutant Screen |                                                                                                                     |
| <i>ibi1-1</i>      | Col-0      | Mutant screen | <i>IBI1</i> FW:GGATCCGAAAGCCGGGAAGTTG<br><i>ibi1-1</i> FW: GGATCCGAAAGCCGGGAAGTTA<br>Rv : AAACCTGCTGCGTAGTTCCCGTCAG |
| <i>ibi1-3</i>      | Col-0      | SALK-103893   | LP: TTGGATTCTGATAATCGGCAC<br>RP: TGATCAGTGATCACAGCAACC                                                              |
| <i>ibi1-4</i>      | Col-0      | SAIL-228-H03  | LP TGACTIONTGTGCCGATAATCCTC<br>RP TTAACGCTTCTGTTCCACCAC                                                             |
| <i>ibi1-hm</i>     | Col-0      | SALK_030485   | NASC ID: N656329                                                                                                    |
| <i>gcn2</i>        | Ler        | 43            | NASC ID: N656329                                                                                                    |
